# Supplementary material for: Computational Modeling Reveals Key Contributions of KCNQ and hERG Currents to the Malleability of Uterine Action Potentials Underpinning Labor
Source: PubMed Central journal article supplement (PMC4256391; doi:10.1371/journal.pone.0114034), 2014-12-04
Supplement: pone.0114034.s006.pdf [file pone.0114034.s006.pdf]

Table S1. Definitions of the equation symbols

| Symbols              | meaning                                                                     |
|----------------------|-----------------------------------------------------------------------------|
| $V$                  | membrane potential                                                          |
| $V_{0.5}$            | half (in)activation constant                                                |
| $V_h$                | holding potential                                                           |
| $V_s$                | voltage steps                                                               |
| $A_c$                | cell surface area                                                           |
| $V_c$                | cell volume                                                                 |
| $C_m$                | specific membrane capacitance                                               |
| $R$                  | the universal gas constant                                                  |
| $F$                  | the Faraday constant                                                        |
| $T$                  | absolute temperature                                                        |
| $\text{Ca}^{2+}$     | calcium ion                                                                 |
| $\text{Na}^+$        | sodium ion                                                                  |
| $\text{K}^+$         | potassium ion                                                               |
| $\text{Cl}^-$        | chloride ion                                                                |
| $\text{Mg}^{2+}$     | magnesium ion                                                               |
| $z_{Na}$             | $\text{Na}^+$ valency                                                       |
| $z_{Ca}$             | $\text{Ca}^{2+}$ valency                                                    |
| $z_K$                | $\text{K}^+$ valency                                                        |
| $\beta$              | Proportion of free $\text{Ca}^{2+}$ ions                                    |
| $[\text{X}]_i$       | intracellular concentration of ion X                                        |
| $[\text{X}]_o$       | extracellular concentration of ion X                                        |
| $[\text{Ca}^{2+}]_i$ | intracellular calcium                                                       |
| $[\text{Ca}^{2+}]_o$ | extracellular calcium                                                       |
| $[\text{Na}^+]_i$    | intracellular sodium                                                        |
| $[\text{Na}^+]_o$    | extracellular sodium                                                        |
| $[\text{K}^+]_i$     | intracellular potassium                                                     |
| $[\text{K}^+]_o$     | extracellular potassium                                                     |
| $[\text{Cl}^-]_i$    | intracellular chloride                                                      |
| $[\text{Cl}^-]_o$    | extracellular chloride                                                      |
| $[\text{Mg}^{2+}]_o$ | extracellular magnesium                                                     |
| $E_{\text{rev}}$     | reversal potential                                                          |
| $E_{\text{CaL}}$     | reversal potential of $I_{\text{CaL}}$                                      |
| $E_{\text{CaT}}$     | reversal potential of $I_{\text{CaT}}$                                      |
| $E_{\text{Na}}$      | reversal potential of $I_{\text{Na}}$                                       |
| $E_h$                | reversal potential of $I_h$                                                 |
| $E_K$                | reversal potential of potassium currents                                    |
| $E_{\text{Cl}}$      | reversal potential of $I_{\text{Cl}(\text{Ca})}$                            |
| $E_{\text{NS}}$      | reversal potential of $I_{\text{NSCC}}$                                     |
| $P_{\text{Ca}}$      | Permeability of calcium, ratio of flux concentration with respect to cesium |
| $P'_{\text{Ca}}$     | Permeability of calcium, corrected with the effect of the electric field    |
| $P_{\text{Na}}$      | Permeability of sodium                                                      |
| $P_K$                | Permeability of potassium                                                   |
| $I$                  | current                                                                     |
| $I_{\text{ion}}$     | total membrane ionic currents                                               |
| $I_{\text{CaL}}$     | L-type $\text{Ca}^{2+}$ current                                             |

Continued on next page

Table S1 – continued from previous page

| Symbols            | meaning                                                                                                    |
|--------------------|------------------------------------------------------------------------------------------------------------|
| $I_{CaT}$          | T-type $Ca^{2+}$ current                                                                                   |
| $I_{Na}$           | fast inward $Na^+$ current                                                                                 |
| $I_h$              | hyperpolarization-activated current                                                                        |
| $I_{KCNQ1}$        | KCNQ1 $K^+$ current                                                                                        |
| $I_{KCNQ4}$        | KCNQ4 $K^+$ current                                                                                        |
| $I_{KCNQ5}$        | KCNQ5 $K^+$ current                                                                                        |
| $I_{hERG}$         | hERG $K^+$ current                                                                                         |
| $I_{K1}$           | voltage-gated $K^+$ current, inactivate with $V_h \geq -40$ mV                                             |
| $I_{K2}$           | voltage-gated $K^+$ current, inactivate with $V_h \geq 0$ mV                                               |
| $I_{Ka}$           | A-type transient $K^+$ current                                                                             |
| $I_{K(Ca)}$        | total $Ca^{2+}$ -activated $K^+$ current                                                                   |
| $I_\alpha$         | $I_{K(Ca)}$ subtype, consists of only $\alpha$ subunits                                                    |
| $I_{\alpha\beta1}$ | $I_{K(Ca)}$ subtype, consists of $\alpha$ and $\beta1$ subunits                                            |
| $I_{Cl(Ca)}$       | $Ca^{2+}$ -activated $Cl^-$ currents                                                                       |
| $I_{NSCC}$         | non-specific cation current                                                                                |
| $I_{NSCC,Ca}$      | calcium component of $I_{NSCC}$                                                                            |
| $I_{NaK}$          | $Na^+$ - $K^+$ pump current                                                                                |
| $I_{NaCa}$         | $Na^+$ - $Ca^{2+}$ exchanger current                                                                       |
| $J$                | $Ca^{2+}$ flux                                                                                             |
| $J_{Ca,mem}$       | $Ca^{2+}$ flux <i>via</i> membrane $Ca^{2+}$ currents                                                      |
| $J_{PMCA}$         | $Ca^{2+}$ flux <i>via</i> plasma membrane $Ca^{2+}$ -ATPase                                                |
| $J_{NaCa}$         | $Ca^{2+}$ flux <i>via</i> $Na^+$ - $Ca^{2+}$ exchanger                                                     |
| $\bar{J}_{PMCA}$   | maximal $J_{PMCA}$                                                                                         |
| $\bar{g}$          | maximum conductance                                                                                        |
| $\bar{g}_{CaL}$    | maximum conductance of $I_{CaL}$                                                                           |
| $\bar{g}_{CaT}$    | maximum conductance of $I_{CaT}$                                                                           |
| $\bar{g}_{Na}$     | maximum conductance of $I_{Na}$                                                                            |
| $\bar{g}_h$        | maximum conductance of $I_h$                                                                               |
| $\bar{g}_{KCNQ1}$  | maximum conductance of $I_{KCNQ1}$                                                                         |
| $\bar{g}_{KCNQ4}$  | maximum conductance of $I_{KCNQ4}$                                                                         |
| $\bar{g}_{KCNQ5}$  | maximum conductance of $I_{KCNQ5}$                                                                         |
| $\bar{g}_{hERG}$   | maximum conductance of $I_{hERG}$                                                                          |
| $\bar{g}_{K1}$     | maximum conductance of $I_{K1}$                                                                            |
| $\bar{g}_{K2}$     | maximum conductance of $I_{K2}$                                                                            |
| $\bar{g}_{Ka}$     | maximum conductance of $I_{Ka}$                                                                            |
| $\bar{g}_{K(Ca)}$  | maximum conductance of $I_{K(Ca)}$                                                                         |
| $\bar{g}_{Cl(Ca)}$ | maximum conductance of $I_{Cl(Ca)}$                                                                        |
| $\bar{g}_{NS}$     | maximum conductance of $I_{NSCC}$                                                                          |
| $g_{NS}$           | conductance of $I_{NSCC}$                                                                                  |
| $g_s$              | numerical constant, used for normalizing dependency of extracellular ions on the conductance of $I_{NSCC}$ |
| $\bar{I}_{NaCa}$   | maximal $I_{NaCa}$                                                                                         |
| $\bar{I}_{NaK}$    | maximal $I_{NaK}$                                                                                          |
| $\bar{F}$          | maximal force                                                                                              |
| $n_K$              | Hill coefficient of $[K^+]_o$ dependency of $I_{NaK}$                                                      |
| $n_{Na}$           | Hill coefficient of $[Na^+]_i$ dependency of $I_{NaK}$                                                     |

Continued on next page

Table S1 – continued from previous page

| Symbols             | meaning                                                                                                                         |
|---------------------|---------------------------------------------------------------------------------------------------------------------------------|
| $n_{\text{PMCA}}$   | Hill coefficient of plasma membrane $\text{Ca}^{2+}$ -ATPase                                                                    |
| $n_{\text{Allo}}$   | Hill coefficient of allosteric regulation of $\text{Na}^+$ - $\text{Ca}^{2+}$ exchanger                                         |
| $n_{\text{F}}$      | Hill coefficient of the steady-state of calcium-dependent active force                                                          |
| $f_{\text{Ca}}$     | Calcium inhibition of $I_{\text{CaL}}$                                                                                          |
| $f_{\text{Mg}}$     | Magnesium inhibition of $I_{\text{NSCC}}$                                                                                       |
| $f_{\text{NaK}}$    | Voltage-dependency of $I_{\text{NaK}}$                                                                                          |
| $n_{\text{NaK}}$    | $[\text{Na}^+]_{\text{i}}$ dependency of $I_{\text{NaK}}$                                                                       |
| $k_{\text{NaK}}$    | $[\text{K}^+]_{\text{o}}$ dependency of $I_{\text{NaK}}$                                                                        |
| $k_{\text{sat}}$    | Saturation factor for $\text{Na}^+$ - $\text{Ca}^{2+}$ exchanger at very negative potential                                     |
| $f_{1,\text{NaCa}}$ | Potential dependency of $I_{\text{NaCa}}$                                                                                       |
| $f_{2,\text{NaCa}}$ | Potential dependency of $I_{\text{NaCa}}$                                                                                       |
| $f_{\text{allo}}$   | Allosteric regulation by $[\text{Ca}^{2+}]_{\text{i}}$ of $\text{Na}^+$ - $\text{Ca}^{2+}$ exchanger                            |
| $\gamma$            | Partition parameter of $I_{\text{NaCa}}$                                                                                        |
| $p_{\text{a}}$      | proportion of $I_{\alpha}$ in $I_{\text{K(Ca)}}$                                                                                |
| $p_{\text{b}}$      | proportion of $I_{\alpha\beta 1}$ in $I_{\text{K(Ca)}}$                                                                         |
| $K_{1,\text{Cl}}$   | Equilibrium constant for the calcium-binding property of $c_{\infty}$ of $I_{\text{Cl(Ca)}}$                                    |
| $K_{2,\text{Cl}}$   | Equilibrium constant for the voltage-dependency of $c_{\infty}$ of $I_{\text{Cl(Ca)}}$                                          |
| $K_{d,\text{CaL}}$  | Half-saturation concentration for $[\text{Ca}^{2+}]_{\text{i}}$ inhibition of $I_{\text{CaL}}$                                  |
| $K_{d,\text{Mg}}$   | Half-saturation concentration for $[\text{Mg}^{2+}]_{\text{o}}$ inhibition of $I_{\text{NSCC}}$                                 |
| $K_{m,\text{K}}$    | Half-saturation concentration for $[\text{K}^+]_{\text{o}}$ dependency of $I_{\text{NaK}}$                                      |
| $K_{m,\text{Na}}$   | Half-saturation concentration for $[\text{Na}^+]_{\text{i}}$ dependency of $I_{\text{NaK}}$                                     |
| $K_{m,\text{PMCA}}$ | Half-saturation concentration for $[\text{Ca}^{2+}]_{\text{i}}$ association of plasma membrane $\text{Ca}^{2+}$ -ATPase         |
| $K_{m,\text{Allo}}$ | Half-saturation concentration for $[\text{Ca}^{2+}]_{\text{i}}$ allosteric factor of $\text{Na}^+$ - $\text{Ca}^{2+}$ exchanger |
| $K_{m,\text{Cai}}$  | Dissociation constant for $[\text{Ca}^{2+}]_{\text{i}}$ of $\text{Na}^+$ - $\text{Ca}^{2+}$ exchanger                           |
| $K_{m,\text{Cao}}$  | Dissociation constant for $[\text{Ca}^{2+}]_{\text{o}}$ of $\text{Na}^+$ - $\text{Ca}^{2+}$ exchanger                           |
| $K_{m,\text{Nai}}$  | Dissociation constant for $[\text{Na}^+]_{\text{i}}$ of $\text{Na}^+$ - $\text{Ca}^{2+}$ exchanger                              |
| $K_{m,\text{Nao}}$  | Dissociation constant for $[\text{Na}^+]_{\text{o}}$ of $\text{Na}^+$ - $\text{Ca}^{2+}$ exchanger                              |
| $K_{m,\text{F}}$    | Apparent affinity constant for $[\text{Ca}^{2+}]_{\text{i}}$ of contraction                                                     |
| $b$                 | Activation gate of $I_{\text{CaT}}$                                                                                             |
| $c$                 | Activation gate of $I_{\text{Cl(Ca)}}$                                                                                          |
| $d$                 | Activation gate of $I_{\text{CaL}}$                                                                                             |
| $f_1$               | Fast inactivation gate of $I_{\text{CaL}}$                                                                                      |
| $f_2$               | Slow inactivation gate of $I_{\text{CaL}}$                                                                                      |
| $g$                 | Inactivation gate of $I_{\text{CaT}}$                                                                                           |
| $h$                 | Inactivation gate of $I_{\text{Na}}$                                                                                            |
| $m$                 | Activation gate of $I_{\text{Na}}$                                                                                              |
| $p$                 | Activation gate of $I_{\text{K2}}$                                                                                              |
| $k_1$               | Fast inactivation gate of $I_{\text{K2}}$                                                                                       |
| $k_2$               | Slow inactivation gate of $I_{\text{K2}}$                                                                                       |
| $q$                 | Activation gate of $I_{\text{K1}}$                                                                                              |
| $r_1$               | Fast inactivation gate of $I_{\text{K1}}$                                                                                       |
| $r_2$               | Slow inactivation gate of $I_{\text{K1}}$                                                                                       |
| $n_{\text{Q1f}}$    | Fast activation gate of $I_{\text{KCNQ1}}$                                                                                      |
| $n_{\text{Q1s}}$    | Slow activation gate of $I_{\text{KCNQ1}}$                                                                                      |

Continued on next page

Table S1 – continued from previous page

| Symbols                 | meaning                                 |
|-------------------------|-----------------------------------------|
| $w_{Q1}$                | Fast inactivation gate of $I_{KCNQ1}$   |
| $s_{Q1}$                | Slow inactivation gate of $I_{KCNQ1}$   |
| $n_{Q4}$                | Activation gate of $I_{KCNQ4}$          |
| $s_{Q4}$                | Inactivation gate of $I_{KCNQ4}$        |
| $n_{Q5f}$               | Fast activation gate of $I_{KCNQ5}$     |
| $n_{Q5s}$               | Slow activation gate of $I_{KCNQ5}$     |
| $w_{Q5}$                | Fast inactivation gate of $I_{KCNQ5}$   |
| $s_{Q5}$                | Slow inactivation gate of $I_{KCNQ5}$   |
| $h_{n1}$                | Fast activation gate of $I_{hERG}$      |
| $h_{n2}$                | Slow activation gate of $I_{hERG}$      |
| $h_s$                   | Inactivation gate of $I_{hERG}$         |
| $s$                     | Activation gate of $I_{K_a}$            |
| $x$                     | Inactivation gate of $I_{K_a}$          |
| $x_{\alpha\beta 1}$     | Activation gate of $I_{\alpha\beta 1}$  |
| $x_\alpha$              | Activation gate of $I_\alpha$           |
| $y$                     | Activation gate of $I_h$                |
| $\omega$                | Activation gate of Force                |
| $b_\infty$              | Steady-state of $b$                     |
| $c_\infty$              | Steady-state of $c$                     |
| $d_\infty$              | Steady-state of $d$                     |
| $f_\infty$              | Steady-state of $f_1$ and $f_2$         |
| $g_\infty$              | Steady-state of $g$                     |
| $h_\infty$              | Steady-state of $h$                     |
| $k_\infty$              | Steady-state of $k_1$ and $k_2$         |
| $m_\infty$              | Steady-state of $m$                     |
| $p_\infty$              | Steady-state of $p$                     |
| $q_\infty$              | Steady-state of $q$                     |
| $r_\infty$              | Steady-state of $r_1$ and $r_2$         |
| $n_{Q1\infty}$          | Steady-state of $n_{Q1f}$ and $n_{Q1s}$ |
| $w_{Q1\infty}$          | Steady-state of $w_{Q1}$                |
| $s_{Q1\infty}$          | Steady-state of $s_{Q1}$                |
| $n_{Q4\infty}$          | Steady-state of $n_{Q4}$                |
| $s_{Q4\infty}$          | Steady-state of $s_{Q4}$                |
| $n_{Q5\infty}$          | Steady-state of $n_{Q5f}$ and $n_{Q5s}$ |
| $w_{Q5\infty}$          | Steady-state of $w_{Q5}$                |
| $s_{Q5\infty}$          | Steady-state of $s_{Q5}$                |
| $h_{n\infty}$           | Steady-state of $h_{n1}$ and $h_{n2}$   |
| $h_{s\infty}$           | Steady-state of $h_s$                   |
| $s_\infty$              | Steady-state of $s$                     |
| $x_\infty$              | Steady-state of $x$                     |
| $y_\infty$              | Steady-state of $y$                     |
| $\omega_\infty$         | Steady-state of $\omega$                |
| $\alpha\beta 1_\infty$  | Steady-state of $x_{\alpha\beta 1}$     |
| $\alpha_\infty$         | Steady-state of $x_\alpha$              |
| $V_{0.5,\alpha\beta 1}$ | Half activation of $x_{\alpha\beta 1}$  |
| $V_{0.5,\alpha}$        | Half activation of $x_\alpha$           |

Continued on next page

Table S1 – continued from previous page

| Symbols                | meaning                              |
|------------------------|--------------------------------------|
| $z_{\alpha\beta 1}$    | Gating charge of $x_{\alpha\beta 1}$ |
| $z_{\alpha}$           | Gating charge of $x_{\alpha}$        |
| $\tau_{\alpha\beta 1}$ | Time constant of $x_{\alpha\beta 1}$ |
| $\tau_{\alpha}$        | Time constant of $x_{\alpha}$        |
| $\tau_b$               | Time constant of $b$                 |
| $\tau_c$               | Time constant of $c$                 |
| $\tau_d$               | Time constant of $d$                 |
| $\tau_{f1}$            | Time constant of $f_1$               |
| $\tau_{f2}$            | Time constant of $f_2$               |
| $\tau_g$               | Time constant of $g$                 |
| $\tau_h$               | Time constant of $h$                 |
| $\tau_{k1}$            | Time constant of $k_1$               |
| $\tau_{k2}$            | Time constant of $k_2$               |
| $\tau_m$               | Time constant of $m$                 |
| $\tau_p$               | Time constant of $p$                 |
| $\tau_q$               | Time constant of $q$                 |
| $\tau_{r1}$            | Time constant of $r_1$               |
| $\tau_{r2}$            | Time constant of $r_2$               |
| $\tau_{nQ1f}$          | Time constant of $n_{Q1f}$           |
| $\tau_{nQ1s}$          | Time constant of $n_{Q1s}$           |
| $\tau_{wQ1}$           | Time constant of $w_{Q1}$            |
| $\tau_{sQ1}$           | Time constant of $s_{Q1}$            |
| $\tau_{nQ4}$           | Time constant of $n_{Q4}$            |
| $\tau_{sQ4}$           | Time constant of $s_{Q4}$            |
| $\tau_{nQ5f}$          | Time constant of $n_{Q5f}$           |
| $\tau_{nQ5s}$          | Time constant of $n_{Q5s}$           |
| $\tau_{wQ5}$           | Time constant of $w_{Q5f}$           |
| $\tau_{sQ5}$           | Time constant of $s_{Q5}$            |
| $\tau_{hn1}$           | Time constant of $h_{n1}$            |
| $\tau_{hn2}$           | Time constant of $h_{n2}$            |
| $\tau_{hs}$            | Time constant of $h_s$               |
| $\tau_s$               | Time constant of $s$                 |
| $\tau_x$               | Time constant of $x$                 |
| $\tau_y$               | Time constant of $y$                 |
| $\tau_{\omega}$        | Time constant of $\omega$            |
| $\alpha_y$             | Rate constant of activation of $y$   |
| $\beta_y$              | Rate constant of deactivation of $y$ |
