# Supplementary material for: Computational Modeling Reveals Key Contributions of KCNQ and hERG Currents to the Malleability of Uterine Action Potentials Underpinning Labor
Source: PubMed Central journal article supplement (PMC4256391; doi:10.1371/journal.pone.0114034), 2014-12-04
Supplement: pone.0114034.s007.pdf [file pone.0114034.s007.pdf]

Table S2. Initial values of the dynamics variables used in model simulations.

| Variables           | Initial conditions |
|---------------------|--------------------|
| $V$                 | -50.81             |
| $[Ca^{2+}]_i$       | 0.000124           |
| $m$                 | 0.166999           |
| $h$                 | 0.315608           |
| $b$                 | 0.585740           |
| $g$                 | 0.028175           |
| $d$                 | 0.016057           |
| $f_1$               | 0.861723           |
| $f_2$               | 0.861723           |
| $q$                 | 0.225602           |
| $r_1$               | 0.126167           |
| $r_2$               | 0.126167           |
| $n_{Q1f}$           | 0.090437           |
| $n_{Q1s}$           | 0.090437           |
| $w_{Q1}$            | 0.923051           |
| $s_{Q1}$            | 0.742674           |
| $n_{Q4}$            | 0.108110           |
| $s_{Q4}$            | 0.628062           |
| $n_{Q5f}$           | 0.261889           |
| $n_{Q5s}$           | 0.261889           |
| $w_{Q5}$            | 0.923051           |
| $s_{Q5}$            | 0.628062           |
| $h_{n1}$            | 0.024990           |
| $h_{n2}$            | 0.024990           |
| $h_s$               | 0.529214           |
| $p$                 | 0.135875           |
| $k_1$               | 0.994483           |
| $k_2$               | 0.994483           |
| $x_\alpha$          | 0.000358           |
| $x_{\alpha\beta 1}$ | 0.002674           |
| $s$                 | 0.045623           |
| $x$                 | 0.061628           |
| $y$                 | 0.001822           |
| $c$                 | 0.000670           |
| $\omega$            | 0.276830           |
