# Supplementary material for: Computational Modeling Reveals Key Contributions of KCNQ and hERG Currents to the Malleability of Uterine Action Potentials Underpinning Labor
Source: PubMed Central journal article supplement (PMC4256391; doi:10.1371/journal.pone.0114034), 2014-12-04
Supplement: pone.0114034.s008.pdf [file pone.0114034.s008.pdf]

Table S3. Constant parameter values used in model simulations.

| Parameters        | values                                    |
|-------------------|-------------------------------------------|
| T                 | 308 K                                     |
| F                 | 96485 C mol <sup>-1</sup>                 |
| R                 | 8.314 J K <sup>-1</sup> mol <sup>-1</sup> |
| $z_{Na}$          | 1                                         |
| $z_K$             | 1                                         |
| $z_{Ca}$          | 2                                         |
| $[Na^+]_i$        | 4 mM                                      |
| $[Na^+]_o$        | 130 mM                                    |
| $[K^+]_i$         | 140 mM                                    |
| $[K^+]_o$         | 6 mM                                      |
| $[Cl^-]_i$        | 46 mM                                     |
| $[Cl^-]_o$        | 130 mM                                    |
| $[Ca^{2+}]_o$     | 2.5 mM                                    |
| $[Mg^{2+}]_o$     | 0.5 mM                                    |
| $C_m$             | 1 $\mu$ F cm <sup>-2</sup>                |
| $A_c/V_c$         | 4 cm <sup>2</sup> $\mu$ l <sup>-1</sup>   |
| $\beta$           | 0.015                                     |
| $\bar{J}_{PMCA}$  | 3.5e <sup>-7</sup> mM ms <sup>-1</sup>    |
| $K_{m,PMCA}$      | 0.5 $\mu$ M                               |
| n <sub>PMCA</sub> | 2                                         |
| $\bar{I}_{NaCa}$  | 5.63 pA pF <sup>-1</sup>                  |
| $K_{m,Allo}$      | 0.3 $\mu$ M                               |
| n <sub>Allo</sub> | 4                                         |
| $k_{sat}$         | 0.27                                      |
| $\gamma$          | 0.35                                      |
| $K_{m,Nai}$       | 30.0 mM                                   |
| $K_{m,Cai}$       | 7 $\mu$ M                                 |
| $K_{m,Nao}$       | 87.5 mM                                   |
| $K_{m,Cao}$       | 1.3 mM                                    |
| $\bar{g}_{CaL}$   | 0.6 nS pF <sup>-1</sup>                   |
| $E_{CaL}$         | 45 mV                                     |
| $K_{m,CaL}$       | 1 $\mu$ M                                 |
| $\bar{g}_{CaT}$   | 0.058 nS pF <sup>-1</sup>                 |
| $E_{CaT}$         | 42 mV                                     |
| $\bar{g}_{Na}$    | 0 nS pF <sup>-1</sup>                     |
| $\bar{g}_h$       | 0.0542 nS pF <sup>-1</sup>                |
| $\bar{g}_{KCNQ1}$ | 0.0032 nS pF <sup>-1</sup>                |
| $\bar{g}_{KCNQ4}$ | 0.024 nS pF <sup>-1</sup>                 |
| $\bar{g}_{KCNQ5}$ | 0.016 nS pF <sup>-1</sup>                 |
| $\bar{g}_{hERG}$  | 0.08 nS pF <sup>-1</sup>                  |
| $\bar{g}_{K1}$    | 0.24 nS pF <sup>-1</sup>                  |
| $\bar{g}_{K2}$    | 0.032 nS pF <sup>-1</sup>                 |
| $\bar{g}_{Ka}$    | 0.16 nS pF <sup>-1</sup>                  |
| $\bar{g}_{BK}$    | 0.8 nS pF <sup>-1</sup>                   |
| $p_a$             | 0.2                                       |

Continued on next page

**Table S3 – continued from previous page**

| <b>Parameters</b>               | <b>values</b>              |
|---------------------------------|----------------------------|
| $p_b$                           | 0.1                        |
| $\bar{g}_{\text{NS}}$           | 0.0123 nS pF <sup>-1</sup> |
| $P_{\text{Na}}/P_{\text{K}}$    | 0.35                       |
| $P_{\text{Ca}} : P_{\text{Cs}}$ | 0.89                       |
| $P_{\text{Na}} : P_{\text{Cs}}$ | 0.9                        |
| $P_{\text{K}} : P_{\text{Cs}}$  | 1.3                        |
| $K_{d,\text{Mg}}$               | 0.28 mM                    |
| $\bar{g}_{\text{Cl}}$           | 0.1875 nS pF <sup>-1</sup> |
| $\bar{I}_{\text{NaK}}$          | 1.7 pA pF <sup>-1</sup>    |
| $K_{d,\text{K}}$                | 2.0 mM                     |
| $n_{\text{K}}$                  | 1.5                        |
| $K_{m,\text{Na}}$               | 22.0 mM                    |
| $n_{\text{Na}}$                 | 2                          |
