# Supplementary material for: Computational Modeling Reveals Key Contributions of KCNQ and hERG Currents to the Malleability of Uterine Action Potentials Underpinning Labor
Source: PubMed Central journal article supplement (PMC4256391; doi:10.1371/journal.pone.0114034), 2014-12-04
Supplement: pone.0114034.s009.pdf [file pone.0114034.s009.pdf]

**Appendix S1. Equations used for the modified USMC model.**

**Equations for KCNQ1 current –  $I_{\text{KCNQ1}}$**

$$I_{\text{KCNQ1}} = \bar{g}_{\text{KCNQ1}} (0.3 n_{\text{Q1f}} + 0.7 n_{\text{Q1s}}) w_{\text{Q1}} s_{\text{Q1}} (V - E_{\text{K}}) \quad (1)$$

$$E_{\text{K}} = \frac{RT}{F} \ln \left( \frac{[\text{K}^+]_{\text{o}}}{[\text{K}^+]_{\text{i}}} \right) \quad (2)$$

$$n_{\text{Q1}\infty} = \frac{1}{1 + \exp \left( \frac{-(V + 22.0)}{12.48} \right)} \quad (3)$$

$$w_{\text{Q1}\infty} = 0.49 + \frac{0.51}{1 + \exp \left( \frac{V + 1.084}{28.78} \right)} \quad (4)$$

$$s_{\text{Q1}\infty} = 0.34 + \frac{0.66}{1 + \exp \left( \frac{V + 45.3}{12.3} \right)} \quad (5)$$

$$\tau_{\text{nQ1f}} = \frac{395.3}{1 + \left( \frac{V + 38.1}{33.59} \right)^2} \quad (6)$$

$$\tau_{\text{nQ1s}} = 5503 - \frac{5345.4}{1 + 10^{(-0.02827(-23.9-V))}} - \frac{4590.6}{1 + 10^{(-0.0357(V+14.15))}} \quad (7)$$

$$\tau_{\text{wQ1}} = 5.44 + \frac{29.2}{1 + \left( \frac{V + 48.09}{48.83} \right)^2} \quad (8)$$

$$\tau_{\text{sQ1}} = 50000 \text{ ms} \quad (9)$$

$$\frac{dn_{\text{Q1f}}}{dt} = \frac{n_{\text{Q1}\infty} - n_{\text{Q1f}}}{\tau_{\text{nQ1f}}} \quad (10)$$

$$\frac{dn_{\text{Q1s}}}{dt} = \frac{n_{\text{Q1}\infty} - n_{\text{Q1s}}}{\tau_{\text{nQ1s}}} \quad (11)$$

$$\frac{dw_{\text{Q1}}}{dt} = \frac{w_{\text{Q1}\infty} - w_{\text{Q1}}}{\tau_{\text{wQ1}}} \quad (12)$$

$$\frac{ds_{\text{Q1}}}{dt} = \frac{s_{\text{Q1}\infty} - s_{\text{Q1}}}{\tau_{\text{sQ1}}} \quad (13)$$

**Equations for KCNQ4 current –  $I_{\text{KCNQ4}}$**

$$I_{\text{KCNQ4}} = \bar{g}_{\text{KCNQ4}} n_{\text{Q4}} s_{\text{Q4}} (V - E_{\text{K}}) \quad (14)$$

$$n_{\text{Q4}\infty} = \frac{1}{1 + \exp\left(\frac{-(V + 15.04)}{16.95}\right)} \quad (15)$$

$$s_{\text{Q4}\infty} = \frac{0.41}{1 + \exp\left(\frac{V + 86.84}{15.05}\right)} + \frac{0.59}{1 + \exp\left(\frac{V - 70.13}{13.37}\right)} \quad (16)$$

$$\tau_{n\text{Q4}} = 10 + \frac{895.9}{1 + \exp\left(\frac{-18.01 - V}{31.04}\right)} \quad (17)$$

$$\tau_{s\text{Q4}} = 1077 + \frac{185845}{1 + \left(\frac{V - 39.44}{7.34}\right)^2} \quad (18)$$

$$\frac{dn_{\text{Q4}}}{dt} = \frac{n_{\text{Q4}\infty} - n_{\text{Q4}}}{\tau_{n\text{Q4}}} \quad (19)$$

$$\frac{ds_{\text{Q4}}}{dt} = \frac{s_{\text{Q4}\infty} - s_{\text{Q4}}}{\tau_{s\text{Q4}}} \quad (20)$$

**Equations for KCNQ5 current –  $I_{\text{KCNQ5}}$**

$$I_{\text{KCNQ5}} = \bar{g}_{\text{KCNQ5}} (0.2 n_{\text{Q5f}} + 0.8 n_{\text{Q5s}}) w_{\text{Q5}} s_{\text{Q5}} (V - E_{\text{K}}) \quad (21)$$

$$n_{\text{Q5}\infty} = \frac{1}{1 + \exp\left(\frac{-(V + 36.55)}{13.76}\right)} \quad (22)$$

$$w_{\text{Q5}\infty} = w_{\text{Q1}\infty} \quad (23)$$

$$s_{\text{Q5}\infty} = s_{\text{Q4}\infty} \quad (24)$$

$$\tau_{\text{nQ5f}} = 37.51 + \frac{539}{1 + \left(\frac{V + 40.24}{17.72}\right)^2} \quad (25)$$

$$\tau_{\text{nQ5s}} = 1000 \text{ ms} \quad (26)$$

$$\tau_{\text{wQ5}} = \tau_{\text{wQ1}} \quad (27)$$

$$\tau_{\text{sQ5}} = \tau_{\text{sQ4}} \quad (28)$$

$$\frac{dn_{\text{Q5f}}}{dt} = \frac{n_{\text{Q5}\infty} - n_{\text{Q5f}}}{\tau_{\text{nQ5f}}} \quad (29)$$

$$\frac{dn_{\text{Q5s}}}{dt} = \frac{n_{\text{Q5}\infty} - n_{\text{Q5s}}}{\tau_{\text{nQ5s}}} \quad (30)$$

$$\frac{dw_{\text{Q5}}}{dt} = \frac{w_{\text{Q5}\infty} - w_{\text{Q5}}}{\tau_{\text{wQ5}}} \quad (31)$$

$$\frac{ds_{\text{Q5}}}{dt} = \frac{s_{\text{Q5}\infty} - s_{\text{Q5}}}{\tau_{\text{sQ5}}} \quad (32)$$

**Equations for hERG current –  $I_{\text{hHERG}}$**

$$I_{\text{hHERG}} = \bar{g}_{\text{hHERG}}(0.8 h_{\text{n1}} + 0.2 h_{\text{n2}}) h_{\text{s}} (V - E_{\text{K}}) \quad (33)$$

$$h_{\text{n}\infty} = \frac{1}{1 + \exp\left(\frac{-(V + 16)}{9.5}\right)} \quad (34)$$

$$h_{\text{s}\infty} = \frac{1}{1 + \exp\left(\frac{V + 48}{24}\right)} \quad (35)$$

$$\tau_{\text{hn1}} = 446.09 + \frac{1685.76}{\left(1 + \exp\left(\frac{-(V + 40.84)}{13.78}\right)\right) \left(1 + \exp\left(\frac{V + 20.63}{15.11}\right)\right)} \quad (36)$$

$$\tau_{\text{hn2}} = 475.66 + \frac{16321.6}{\left(1 + \exp\left(\frac{-(V + 41.83)}{6.96}\right)\right) \left(1 + \exp\left(\frac{V + 23.24}{21.29}\right)\right)} \quad (37)$$

$$\tau_{\text{hs}} = \frac{19.78}{1 + \left(\frac{V + 20.71}{44.28}\right)^2} - 0.378 \quad (38)$$

$$\frac{dh_{\text{n1}}}{dt} = \frac{h_{\text{n}\infty} - h_{\text{n1}}}{\tau_{\text{hn1}}} \quad (39)$$

$$\frac{dh_{\text{n2}}}{dt} = \frac{h_{\text{n}\infty} - h_{\text{n2}}}{\tau_{\text{hn2}}} \quad (40)$$

$$\frac{dh_{\text{s}}}{dt} = \frac{h_{\text{s}\infty} - h_{\text{s}}}{\tau_{\text{hs}}} \quad (41)$$

**L-type Calcium current –  $I_{CaL}$** 

$$I_{CaL} = \bar{g}_{CaL} d^2 f_{Ca} (0.8f_1 + 0.2f_2)(V - E_{CaL}) \quad (42)$$

$$f_{Ca} = \frac{1}{1 + \left(\frac{[Ca^{2+}]_i}{K_{d,CaL}}\right)^4} \quad (43)$$

$$d_\infty = \frac{1}{1 + \exp\left(\frac{-(V + 22)}{7}\right)} \quad (44)$$

$$f_\infty = \frac{1}{1 + \exp\left(\frac{V + 38}{7}\right)} \quad (45)$$

$$\tau_d = 2.29 + \frac{5.7}{1 + \left(\frac{V + 29.97}{9}\right)^2} \quad (46)$$

$$\tau_{f1} = 12\text{ms} \quad (47)$$

$$\tau_{f2} = 90.97 \left( 1 - \frac{1}{\left(1 + \exp\left(\frac{V + 13.96}{45.38}\right)\right) \left(1 + \exp\left(\frac{-(V + 9.5)}{3.39}\right)\right)} \right) \quad (48)$$

$$\frac{dd}{dt} = \frac{d_\infty - d}{\tau_d} \quad (49)$$

$$\frac{df_1}{dt} = \frac{f_\infty - f_1}{\tau_{f1}} \quad (50)$$

$$\frac{df_2}{dt} = \frac{f_\infty - f_2}{\tau_{f2}} \quad (51)$$

Sodium current –  $I_{\text{Na}}$ 

$$I_{\text{Na}} = \bar{g}_{\text{Na}} m^3 h (V - E_{\text{Na}}) \quad (52)$$

$$E_{\text{Na}} = \frac{RT}{F} \ln \left( \frac{[\text{Na}^+]_o}{[\text{Na}^+]_i} \right) \quad (53)$$

$$m_{\infty} = \frac{1}{1 + \exp \left( \frac{-(V + 35.96)}{9.24} \right)} \quad (54)$$

$$h_{\infty} = \frac{1}{1 + \exp \left( \frac{V + 57}{8} \right)} \quad (55)$$

$$\tau_m = 0.25 + \frac{7}{1 + \exp \left( \frac{V + 38}{10} \right)} \quad (56)$$

$$\tau_h = 0.9 + \frac{1002.85}{1 + \left( \frac{V + 47.5}{1.5} \right)^2} \quad (57)$$

$$\frac{dm}{dt} = \frac{m_{\infty} - m}{\tau_m} \quad (58)$$

$$\frac{dh}{dt} = \frac{h_{\infty} - h}{\tau_h} \quad (59)$$

**T-type Calcium current –  $I_{CaT}$** 

$$I_{CaT} = \bar{g}_{CaT} b^2 g (V - E_{CaT}) \quad (60)$$

$$b_{\infty} = \frac{1}{1 + \exp\left(\frac{-(V + 54.23)}{9.88}\right)} \quad (61)$$

$$g_{\infty} = 0.02 + \frac{0.98}{1 + \exp\left(\frac{V + 72.98}{4.64}\right)} \quad (62)$$

$$\tau_b = 0.45 + \frac{3.9}{1 + \left(\frac{V + 66}{26}\right)^2} \quad (63)$$

$$\tau_g = \left( 150 - \frac{150}{\left(1 + \exp\left(\frac{V - 417.43}{203.18}\right)\right) \left(1 + \exp\left(\frac{-(V + 61.11)}{8.07}\right)\right)} \right) \quad (64)$$

$$\frac{db}{dt} = \frac{b_{\infty} - b}{\tau_b} \quad (65)$$

$$\frac{dg}{dt} = \frac{g_{\infty} - g}{\tau_g} \quad (66)$$

**Hyperpolarisation-activated current –  $I_h$** 

$$I_h = \bar{g}_h y (V - E_h) \quad (67)$$

$$E_h = \frac{RT}{F} \ln \left( \frac{[\text{K}^+]_o + (P_{\text{Na}}/P_{\text{K}})[\text{Na}^+]_o}{[\text{K}^+]_i + (P_{\text{Na}}/P_{\text{K}})[\text{Na}^+]_i} \right) \quad (68)$$

$$y_\infty = \frac{1}{1 + \exp \left( \frac{V + 105.39}{8.66} \right)} \quad (69)$$

$$\tau_y = \frac{1}{3.5e^{-6} \exp(-0.0497V) + 0.04 \exp(0.0521V)} \quad (70)$$

$$\frac{dy}{dt} = \frac{y_\infty - y}{\tau_y} \quad (71)$$



**Voltage dependent potassium current –  $I_{K1}$**

$$I_{K1} = \bar{g}_{K1} q^2 (0.38r_1 + 0.62r_2)(V - E_K) \quad (72)$$

$$q_\infty = \frac{1}{1 + \exp\left(\frac{-(V + 18.67)}{26.66}\right)} \quad (73)$$

$$r_\infty = \frac{1}{1 + \exp\left(\frac{V + 63}{6.3}\right)} \quad (74)$$

$$\tau_q = \frac{500}{1 + \left(\frac{V + 60.71}{15.79}\right)^2} \quad (75)$$

$$\tau_{r1} = \frac{5e^4}{1 + \left(\frac{V + 62.71}{35.86}\right)^2} \quad (76)$$

$$\tau_{r2} = 3e^4 + \frac{2.2e^5}{1 + \exp\left(\frac{V + 22}{4}\right)} \quad (77)$$

$$\frac{dq}{dt} = \frac{q_\infty - q}{\tau_q} \quad (78)$$

$$\frac{dr_1}{dt} = \frac{r_\infty - r_1}{\tau_{r1}} \quad (79)$$

$$\frac{dr_2}{dt} = \frac{r_\infty - r_2}{\tau_{r2}} \quad (80)$$

**Voltage dependent potassium current –  $I_{K2}$** 

$$I_{K2} = \bar{g}_{K2} p^2 (0.75k_1 + 0.25k_2)(V - E_K) \quad (81)$$

$$p_\infty = \frac{1}{1 + \exp\left(\frac{-(V + 0.948)}{17.91}\right)} \quad (82)$$

$$k_\infty = \frac{1}{1 + \exp\left(\frac{(V + 21.2)}{5.7}\right)} \quad (83)$$

$$\tau_p = \frac{100}{1 + \left(\frac{V + 64.1}{28.67}\right)^2} \quad (84)$$

$$\tau_{k1} = 1e^6 \left( 1 - \frac{1}{\left(1 + \exp\left(\frac{V - 315}{50}\right)\right) \left(1 + \exp\left(\frac{-(V + 74.9)}{8}\right)\right)} \right) \quad (85)$$

$$\tau_{k2} = 2.5e^6 \left( 1 - \frac{1}{\left(1 + \exp\left(\frac{V - 132.87}{25.40}\right)\right) \left(1 + \exp\left(\frac{-(V + 24.92)}{2.68}\right)\right)} \right) \quad (86)$$

$$\frac{dp}{dt} = \frac{p_\infty - p}{\tau_p} \quad (87)$$

$$\frac{dk_1}{dt} = \frac{k_\infty - k_1}{\tau_{k1}} \quad (88)$$

$$\frac{dk_2}{dt} = \frac{k_\infty - k_2}{\tau_{k2}} \quad (89)$$

**Transient potassium current –  $I_{K_a}$** 

$$I_{K_a} = \bar{g}_{K_a} s x (V - E_K) \quad (90)$$

$$s_\infty = \frac{1}{1 + \exp\left(\frac{-(V + 27.79)}{7.57}\right)} \quad (91)$$

$$x_\infty = 0.02 + \frac{0.98}{1 + \exp\left(\frac{V + 69.5}{6}\right)} \quad (92)$$

$$\tau_s = \frac{17}{1 + \left(\frac{V + 20.52}{35}\right)^2} \quad (93)$$

$$\tau_x = 7.5 + \frac{10}{1 + \left(\frac{V + 34.18}{120}\right)^2} \quad (94)$$

$$\frac{ds}{dt} = \frac{s_\infty - s}{\tau_s} \quad (95)$$

$$\frac{dx}{dt} = \frac{x_\infty - x}{\tau_x} \quad (96)$$

**Calcium-activation potassium current –  $I_{K,Ca}$**

$$I_{K(Ca)} = \bar{g}_{K(Ca)}(p_a I_\alpha + p_b I_{\alpha\beta 1}) \quad (97)$$

$$I_\alpha = x_\alpha(V - E_K) \quad (98)$$

$$z_\alpha = \frac{8.38}{1 + \left(\frac{1000[Ca^{2+}]_i + 1538.29}{739.06}\right)^2} - \frac{0.749}{1 + \left(\frac{1000[Ca^{2+}]_i - 0.063}{0.162}\right)^2} \quad (99)$$

$$V_{0.5,\alpha} = \frac{5011.47}{1 + \left(\frac{1000[Ca^{2+}]_i + 0.238}{0.000239}\right)^{0.423}} - 37.51 \quad (100)$$

$$x_{\alpha\infty} = \frac{1}{1 + \exp\left(-\frac{z_\alpha F(V - V_{0.5,\alpha})}{RT}\right)} \quad (101)$$

$$\tau_\alpha = \frac{2.41}{1 + \left(\frac{V - 158.78}{-52.15}\right)^2} \quad (102)$$

$$\frac{dx_\alpha}{dt} = \frac{x_{\alpha\infty} - x_\alpha}{\tau_\alpha} \quad (103)$$

$$I_{\alpha\beta 1} = x_{\alpha\beta 1}(V - E_K) \quad (104)$$

$$z_{\alpha\beta 1} = \frac{1.4}{1 + \left(\frac{1000[Ca^{2+}]_i + 228.71}{684.95}\right)^2} - \frac{0.681}{1 + \left(\frac{1000[Ca^{2+}]_i - 0.219}{0.428}\right)^2} \quad (105)$$

$$V_{0.5,\alpha\beta 1} = \frac{8540.23}{1 + \left(\frac{1000[Ca^{2+}]_i + 0.401}{0.00399}\right)^{0.668}} - 109.28 \quad (106)$$

$$x_{\alpha\beta 1\infty} = \frac{1}{1 + \exp\left(-\frac{z_{\alpha\beta 1} F(V - V_{0.5,\alpha\beta 1})}{RT}\right)} \quad (107)$$

$$\tau_{\alpha\beta 1} = \frac{13.8}{1 + \left(\frac{V - 153.02}{66.5}\right)^2} \quad (108)$$

$$\frac{dx_{\alpha\beta 1}}{dt} = \frac{x_{\alpha\beta 1\infty} - x_{\alpha\beta 1}}{\tau_{\alpha\beta 1}} \quad (109)$$

**Calcium-activated chloride current –  $I_{Cl(Ca)}$** 

$$I_{Cl(Ca)} = \bar{g}_{Cl}c(V - E_{Cl}) \quad (110)$$

$$E_{Cl} = \frac{RT}{F} \ln \left( \frac{[Cl^-]_i}{[Cl^-]_o} \right) \quad (111)$$

$$K_{1,Cl} = 0.0006 \exp \left( \frac{2.53FV}{RT} \right) \quad (112)$$

$$K_{2,Cl} = 0.1 \exp \left( \frac{-5FV}{RT} \right) \quad (113)$$

$$c_\infty = \frac{1}{1 + K_{2,Cl} \left( \left( \frac{K_{1,Cl}}{[Ca^{2+}]_i} \right)^2 + \frac{K_{1,Cl}}{[Ca^{2+}]_i} + 1 \right)} \quad (114)$$

$$\tau_c = \frac{210}{1 + \exp \left( \frac{V + 4.56}{11.62} \right)} + \frac{170}{1.0 + \exp \left( \frac{-(V + 25.5)}{11.62} \right)} - 160 \quad (115)$$

$$\frac{dc}{dt} = \frac{c_\infty - c}{\tau_c} \quad (116)$$

**Non-selective cation current –  $I_{\text{NSCC}}$**

$$I_{\text{NSCC}} = g_{\text{NS}} f_{Mg} (V - E_{\text{NS}}) \quad (117)$$

$$g_{\text{NS}} = \bar{g}_{\text{NS}} [0.5g([\text{Ca}^{2+}]_o) + g([\text{Na}^+]_o) + 1.19g([\text{K}^+]_o)] + \bar{g}_L \quad (118)$$

$$g([\text{X}]_o) = \frac{1}{g_s} \frac{0.03}{1 + \left( \frac{150}{[\text{X}]_o + 10^{-8}} \right)^2}, \quad g_s = \begin{cases} 0.000525 & \text{if ion is Ca}^{2+} \\ 0.0123 & \text{otherwise} \end{cases} \quad (119)$$

$$f_{Mg} = 0.1 + \frac{0.9}{1 + \left( \frac{[\text{Mg}^{2+}]_o}{K_{d,\text{Mg}}} \right)^{1.3}} \quad (120)$$

$$E_{\text{NS}} = \frac{RT}{F} \ln \left( \frac{\frac{P_{\text{Na}}}{P_{\text{Cs}}}[\text{Na}^+]_o + \frac{P_{\text{K}}}{P_{\text{Cs}}}[\text{K}^+]_o + \frac{4P'_{\text{Ca}}}{P_{\text{Cs}}}[\text{Ca}^{2+}]_o}{\frac{P_{\text{Na}}}{P_{\text{Cs}}}[\text{Na}^+]_i + \frac{P_{\text{K}}}{P_{\text{Cs}}}[\text{K}^+]_i + \frac{4P'_{\text{Ca}}}{P_{\text{Cs}}}[\text{Ca}^{2+}]_i} \right) \quad (121)$$

$$P'_{\text{Ca}} = \frac{P_{\text{Ca}}}{1 + \exp\left(\frac{VF}{RT}\right)} \quad (122)$$

**Sodium potassium pump current –  $I_{NaK}$**

$$I_{NaK} = I_{NaK} f_{NaK} k_{NaK} n_{NaK} \quad (123)$$

$$f_{NaK} = \frac{1}{\left( 1 + 0.125 \exp\left(\frac{-0.1VF}{RT}\right) + 0.00219 \exp\left(\frac{[Na^+]_o}{49.71}\right) \exp\left(\frac{-1.9VF}{RT}\right) \right)} \quad (124)$$

$$k_{NaK} = \frac{1}{1 + \left(\frac{K_{m,K}}{[K^+]_o}\right)^{n_K}} \quad (125)$$

$$n_{NaK} = \frac{1}{1 + \left(\frac{K_{m,Na}}{[Na^+]_i}\right)^{n_{Na}}} \quad (126)$$

**Sodium calcium exchanger current –  $I_{NaCa}$**

$$I_{NaCa} = \frac{\bar{I}_{NaCa} f_{allo} ([Na^+]_i^3 [Ca^{2+}]_o f_{2,NaCa} - [Na^+]_o^3 [Ca^{2+}]_i f_{1,NaCa})}{(1 + k_{sat} f_{1,NaCa}) \left( \begin{array}{l} K_{m,Cao} [Na^+]_i^3 + K_{m,NaO}^3 [Ca^{2+}]_i + \\ [Ca^{2+}]_o [Na^+]_i^3 + [Na^+]_o^3 [Ca^{2+}]_i + \\ K_{m,Nai}^3 [Ca^{2+}]_o \left( 1 + \frac{[Ca^{2+}]_i}{K_{m,Cai}} \right) + \\ [Na^+]_o^3 K_{m,Cai} \left( 1 + \left( \frac{[Na^+]_i}{K_{m,Nai}} \right)^3 \right) \end{array} \right)} \quad (127)$$

$$f_{1,NaCa} = \exp \left( (\gamma - 1) \frac{VF}{RT} \right) \quad (128)$$

$$f_{2,NaCa} = \exp \left( \gamma \frac{VF}{RT} \right) \quad (129)$$

$$f_{allo} = \frac{1}{1 + \left( \frac{K_{m,Allo}}{[Ca^{2+}]_i} \right)^{n_{Allo}}} \quad (130)$$



**Membrane potential -  $V$**

$$\frac{dV}{dt} = - \left( \frac{I_{CaL} + I_{CaT} + I_{Na} + I_h + I_{Cl(Ca)} + I_{NSCC} + I_{NaK} + I_{NaCa} + I_{KCNQ1} + I_{KCNQ4} + I_{KCNQ5} + I_{hERG} + I_{K1} + I_{K2} + I_{Ka} + I_{K(Ca)}}{C_m} \right) \quad (131)$$

**$[Ca^{2+}]_i$  dynamics**

$$\frac{d[Ca^{2+}]_i}{dt} = -(J_{Ca,mem} + J_{NaCa} + J_{PMCA}) \quad (132)$$

**$Ca^{2+}$  flux from membrane calcium channels -  $J_{Ca,mem}$**

$$J_{Ca,mem} = \beta \frac{C_m A_c}{z_{Ca} F V_c} (I_{CaL} + I_{CaT} + I_{NSCC,Ca}) \quad (133)$$

**$Ca^{2+}$  flux from sodium calcium exchanger -  $J_{NaCa}$**

$$J_{NaCa} = \beta \frac{C_m A_c}{z_{Ca} F V_c} I_{NaCa} \quad (134)$$

**$Ca^{2+}$  flux from plasma membrane  $Ca^{2+}$ -ATPase -  $J_{PMCA}$**

$$J_{PMCA} = \frac{\bar{J}_{PMCA}}{1 + \left( \frac{K_{m,PMCA}}{[Ca^{2+}]_i} \right)^{n_{PMCA}}} \quad (135)$$

**$[Ca^{2+}]_i$ -dependent force**

$$\text{Force} = \bar{F} \omega \quad (136)$$

$$\omega_\infty = \frac{1}{1 + \left( \frac{K_{m,F}}{[Ca^{2+}]_i} \right)^{n_F}} \quad (137)$$

$$\tau_\omega = 4000 \left( 0.235 + \frac{1 - 0.235}{1 + \left( \frac{[Ca^{2+}]_i}{K_{m,F}} \right)^{n_F}} \right) \quad (138)$$

$$\frac{d\omega}{dt} = \frac{\omega_\infty - \omega}{\tau_\omega} \quad (139)$$
